# Supplementary material for: ZIF-67-Derived Flexible Sulfur Cathode with Improved Redox Kinetics for High-Performance Li-S Batteries
Source: MDPI journal article supplement (doi:10.3390/molecules29081833), 2024-04-17
Supplement: s1 [file s1]

## Supporting Information

### ZIF-67-Derived Flexible Sulfur Cathode with Improved Redox Kinetics for High-Performance Li-S Batteries

Chen Cheng <sup>1</sup>, Hanyan Wu <sup>1</sup>, Xinyang Chen <sup>1</sup>, Shuiping Cai <sup>1</sup>, Yingkang Tian <sup>1</sup>, Xiaofei Yang <sup>2</sup> and Xuejie Gao <sup>1,\*</sup>

<sup>1</sup> Center for Lignocellulosic Chemistry and Biomaterials, College of Light Industry and Chemical Engineering, Dalian Polytechnic University, Dalian 116034, China; cc15298509429@163.com (C.C.); wuhy1904@163.com (H.W.); cxysmail1@gmail.com (X.C.); caishuiping1086@163.com (S.C.); m15304113180@163.com (Y.T.)

<sup>2</sup> Division of Energy Storage, Dalian National Laboratory for Clean Energy, Dalian Institute of Chemical Physics, Chinese Academy of Sciences, 457 Zhongshan Road, Dalian 116023, China; yangxf@dicp.ac.cn

\* Correspondence: gaoxuejie1107@163.com

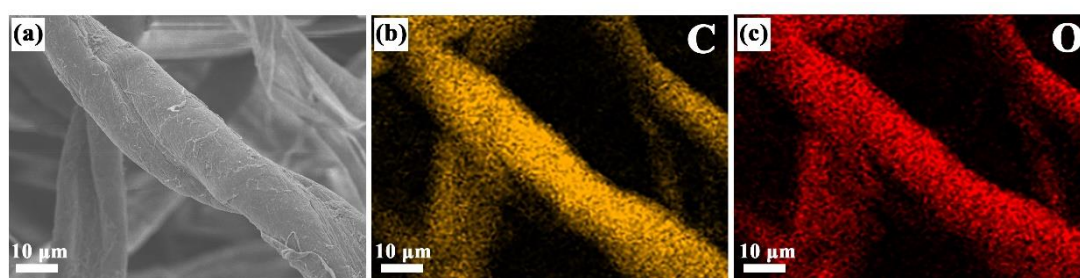

**Figure S1:** SEM images of (a) CL and (b) (c) corresponding elemental mappings of C, O.

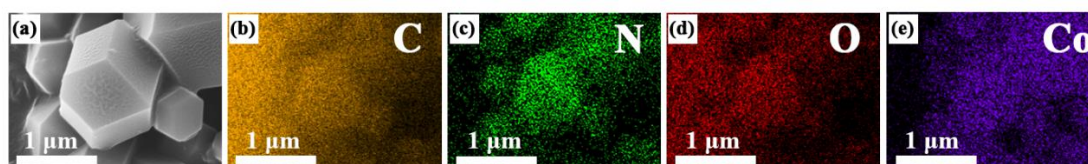

**Figure S2:** SEM images of (a) ZIF-67 powder and (b-e) corresponding elemental mappings of C, N, O, Co.

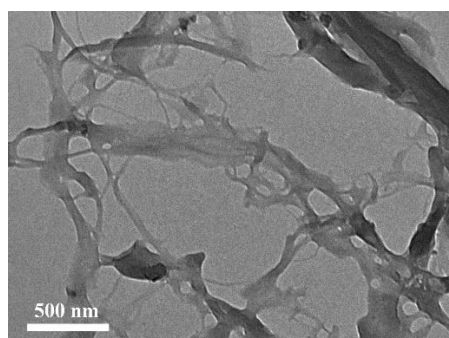

**Figure S3:** TEM images of CL.

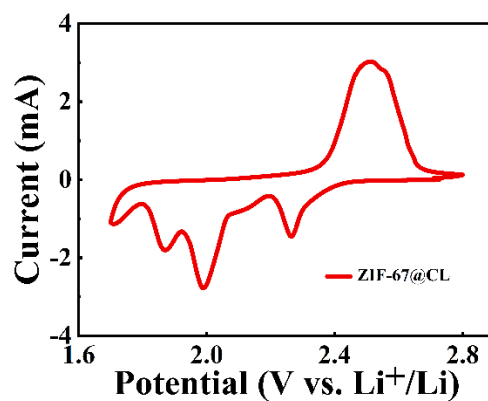

Figure S4: CV profiles at first cycle.

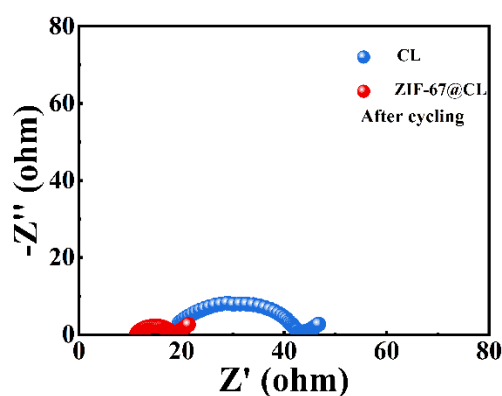

Figure S5: EIS plots after cycling.

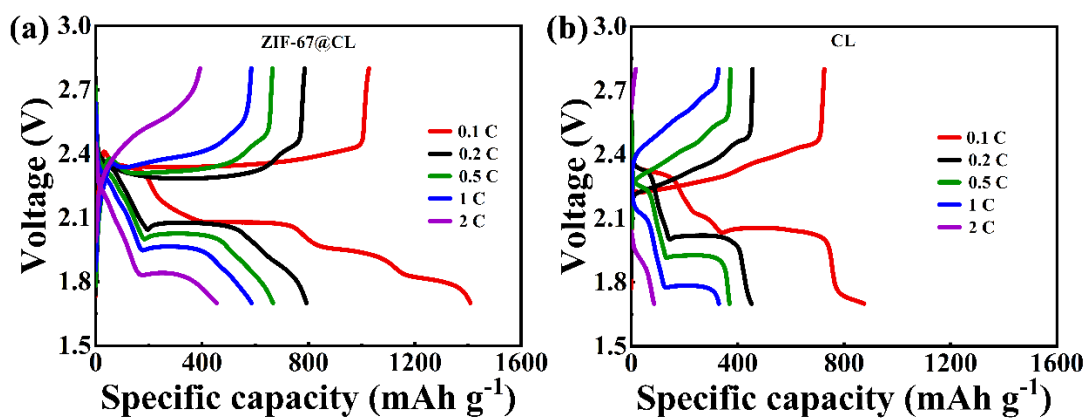

Figure S6: Rate performance correspond charge/discharge profiles of (a) S/ZIF-67@CL and (b) S/CL.

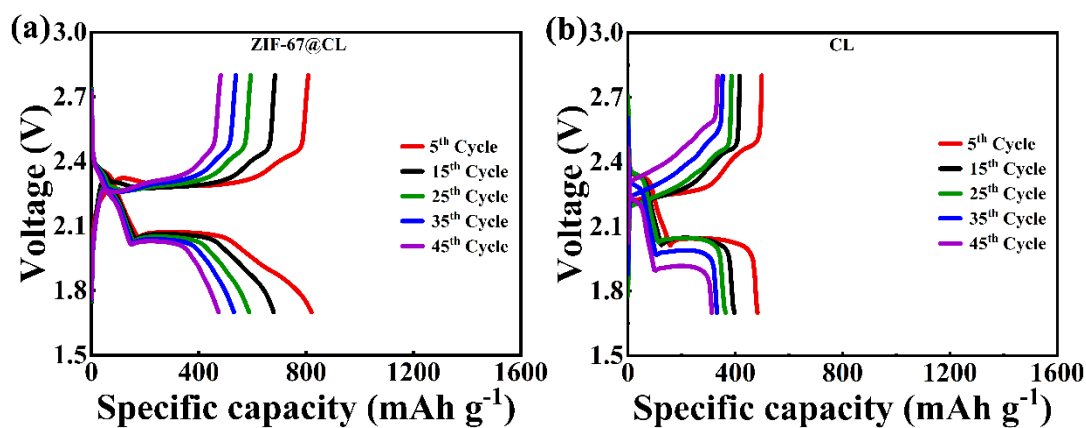

**Figure S7:** (a) S/ZIF-67@CL and (b) S/CL charge/discharge curves of different cycles at 0.2 C.

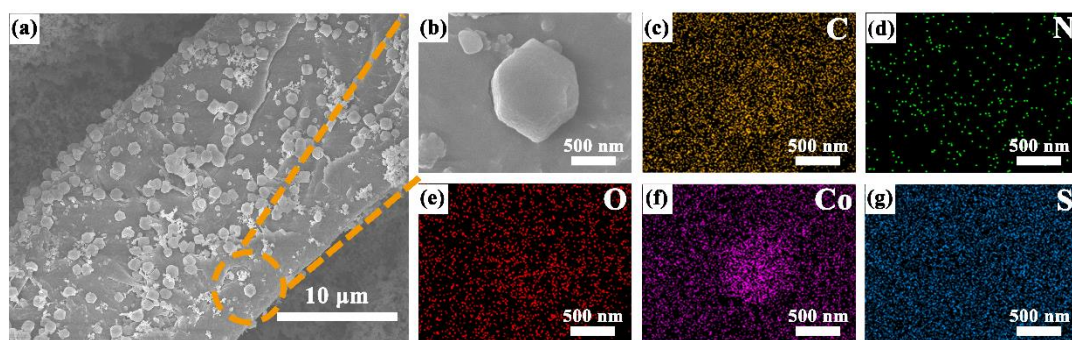

**Figure S8:** SEM images of (a) (b) ZIF-67@CL after Li-S batteries cycling and (c-g) corresponding elemental mappings of C, N, O, Co, S.

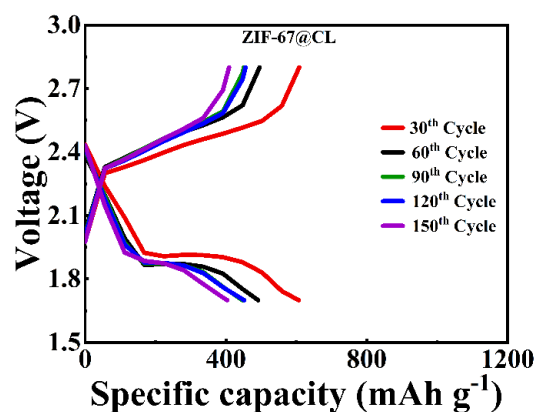

**Figure S9:** S/ZIF-67@CL charge/discharge curves of different cycles at 2 C.
